# Supplementary material for: Divergent Evolution of a Protein–Protein Interaction Revealed through Ancestral Sequence Reconstruction and Resurrection
Source: PubMed Central journal article supplement (PMC7782867; doi:10.1093/molbev/msaa198), 2020-08-04
Supplement: msaa198_supplementary_data.pdf [file msaa198_supplementary_data.pdf]

## Supplementary material

# Divergent evolution of a protein-protein interaction revealed through ancestral sequence reconstruction and resurrection

Louise Laursen<sup>1</sup>, Jelena Čalyševa<sup>2,3</sup>, Toby J. Gibson<sup>2</sup>, and Per Jemth<sup>1\*</sup>

<sup>1</sup>Department of Medical Biochemistry and Microbiology, Uppsala University, BMC Box 582, SE-75123 Uppsala, Sweden.

<sup>2</sup>Structural and Computational Biology Unit, European Molecular Biology Laboratory, Heidelberg 69117, Germany.

<sup>3</sup>Collaboration for joint PhD degree between EMBL and Heidelberg University, Faculty of Biosciences

\*Corresponding author: [Per.Jemth@imbim.uu.se](mailto:Per.Jemth@imbim.uu.se)

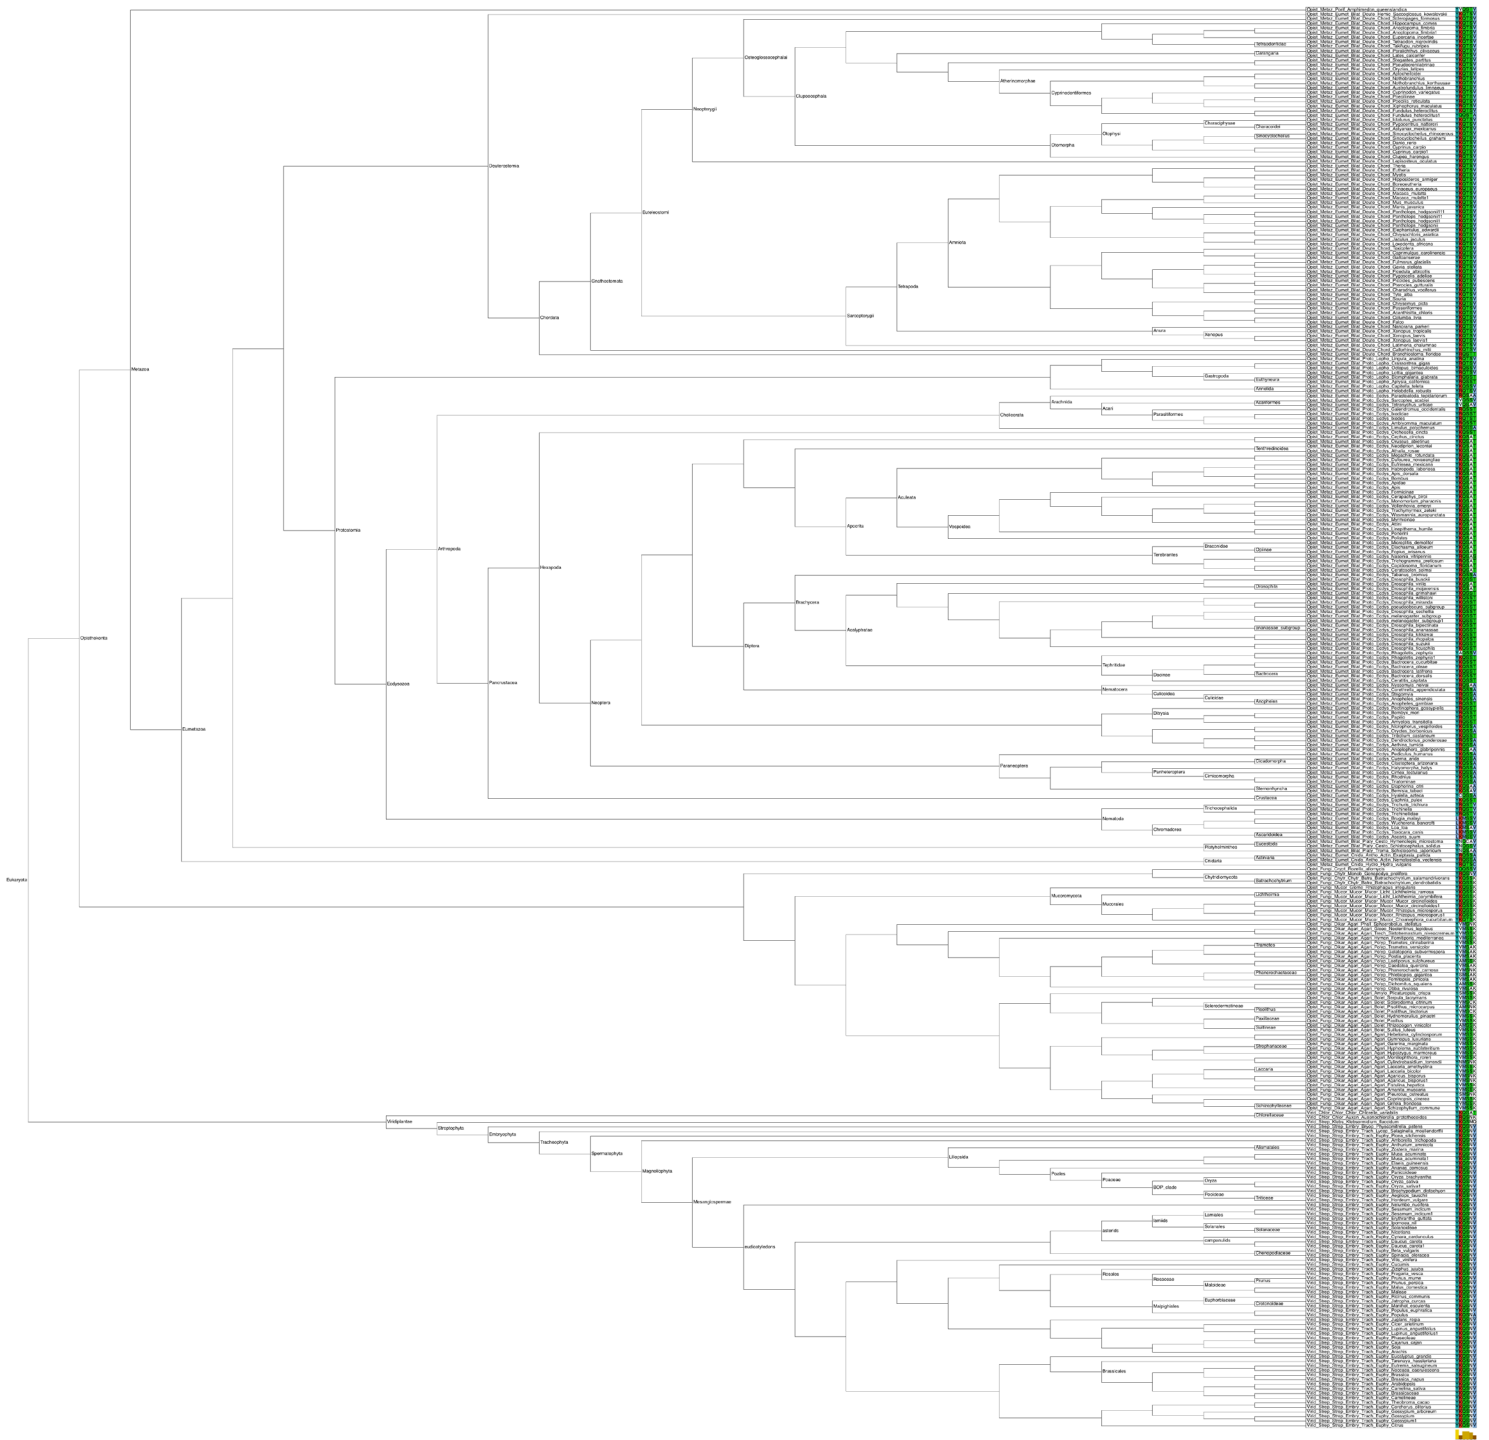

**Supplementary Fig. 1**

**Sequence alignment of all CRIPT sequences used for ancestral reconstruction.** The details on sequence conservation are displayed. Conserved amino acids are colored according to their physicochemical properties. The alignment was visualised using Jalview and Dendroscope software (Huson and Scornavacca 2012).

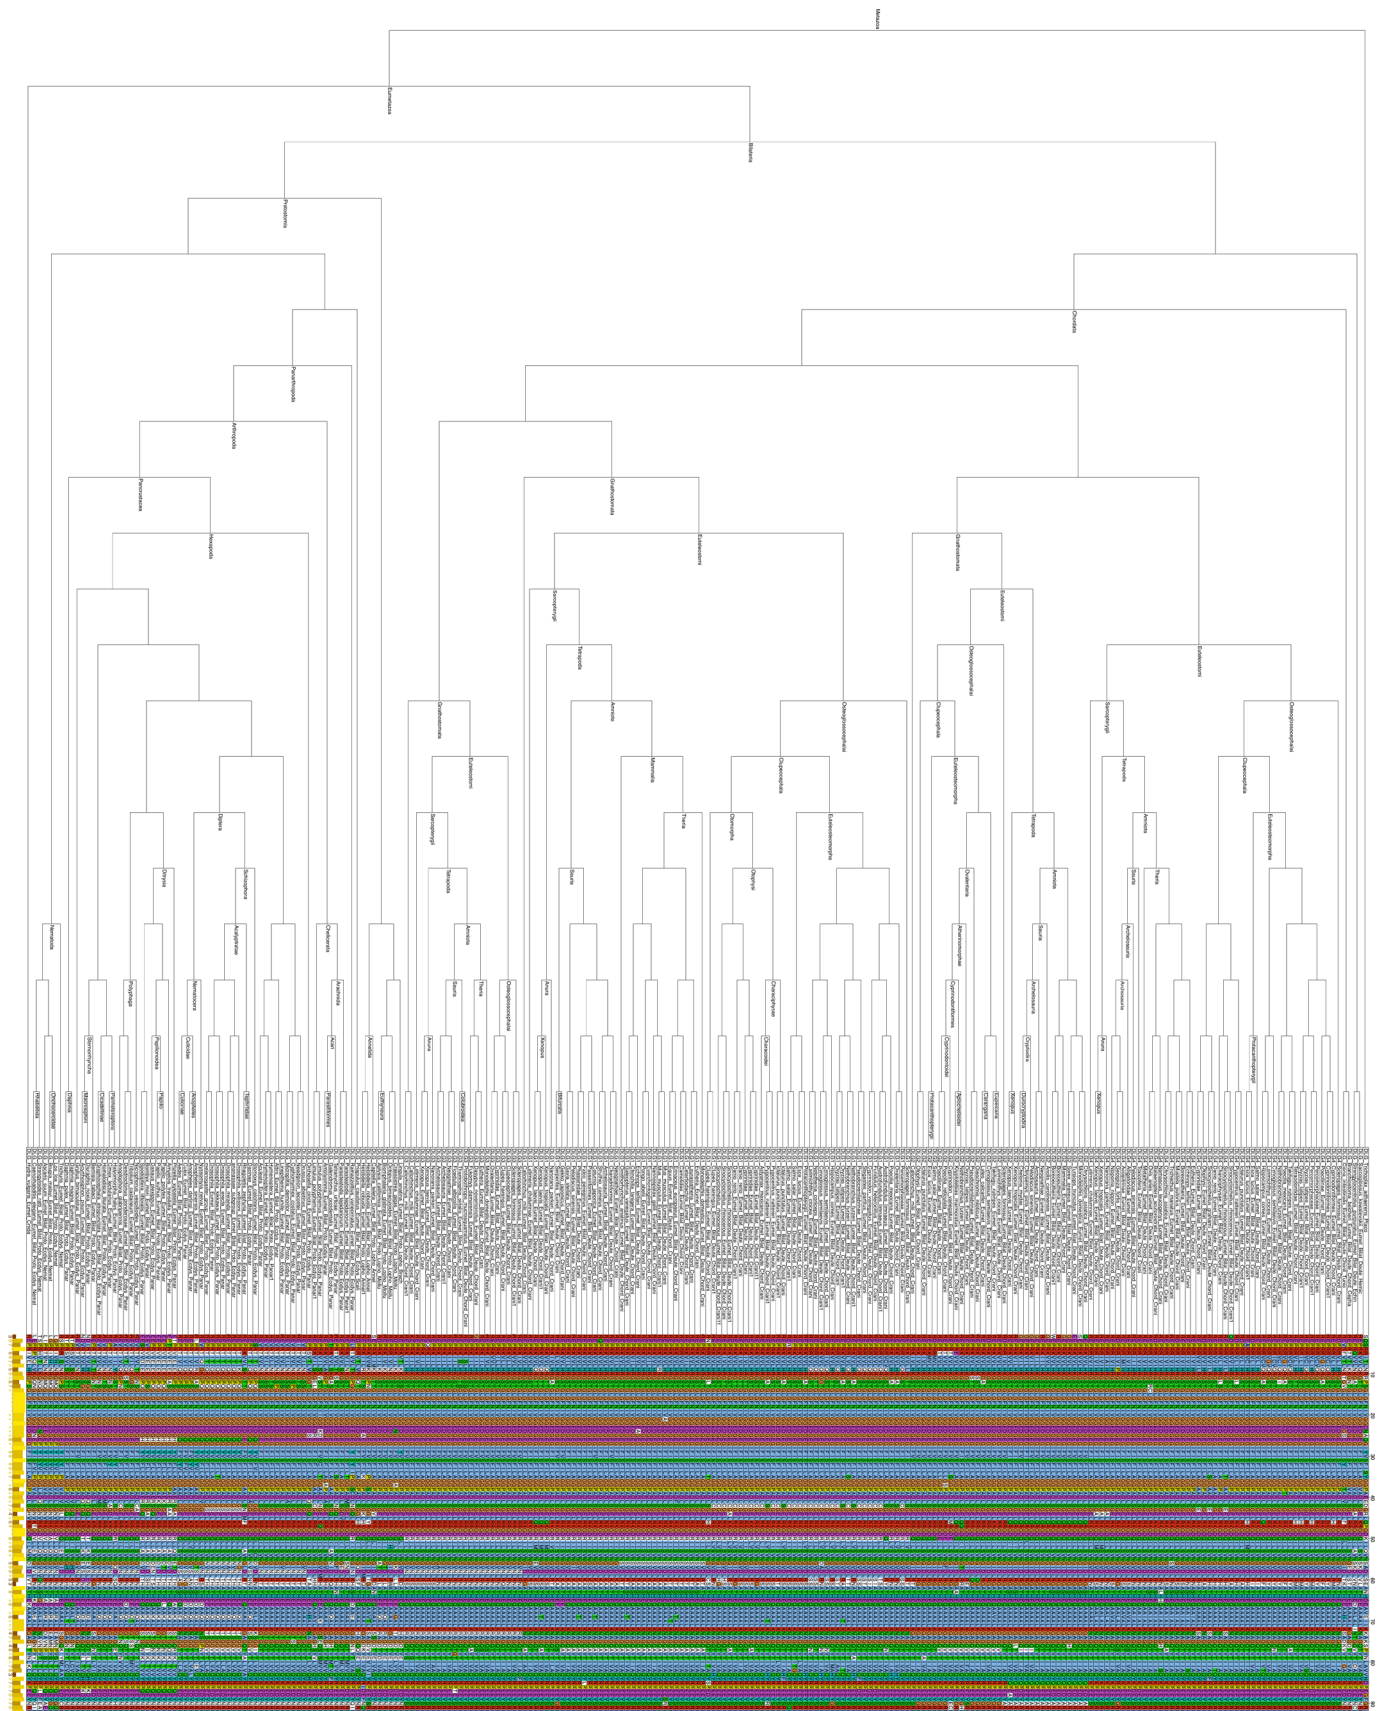

**Supplementary Fig.2**

**Sequence alignment of all DLG PDZ3 sequences used for ancestral reconstruction.** Conserved amino acids are colored according to their physicochemical properties. The alignment was visualised using Jalview and Dendroscope software (Huson and Scornavacca 2012).

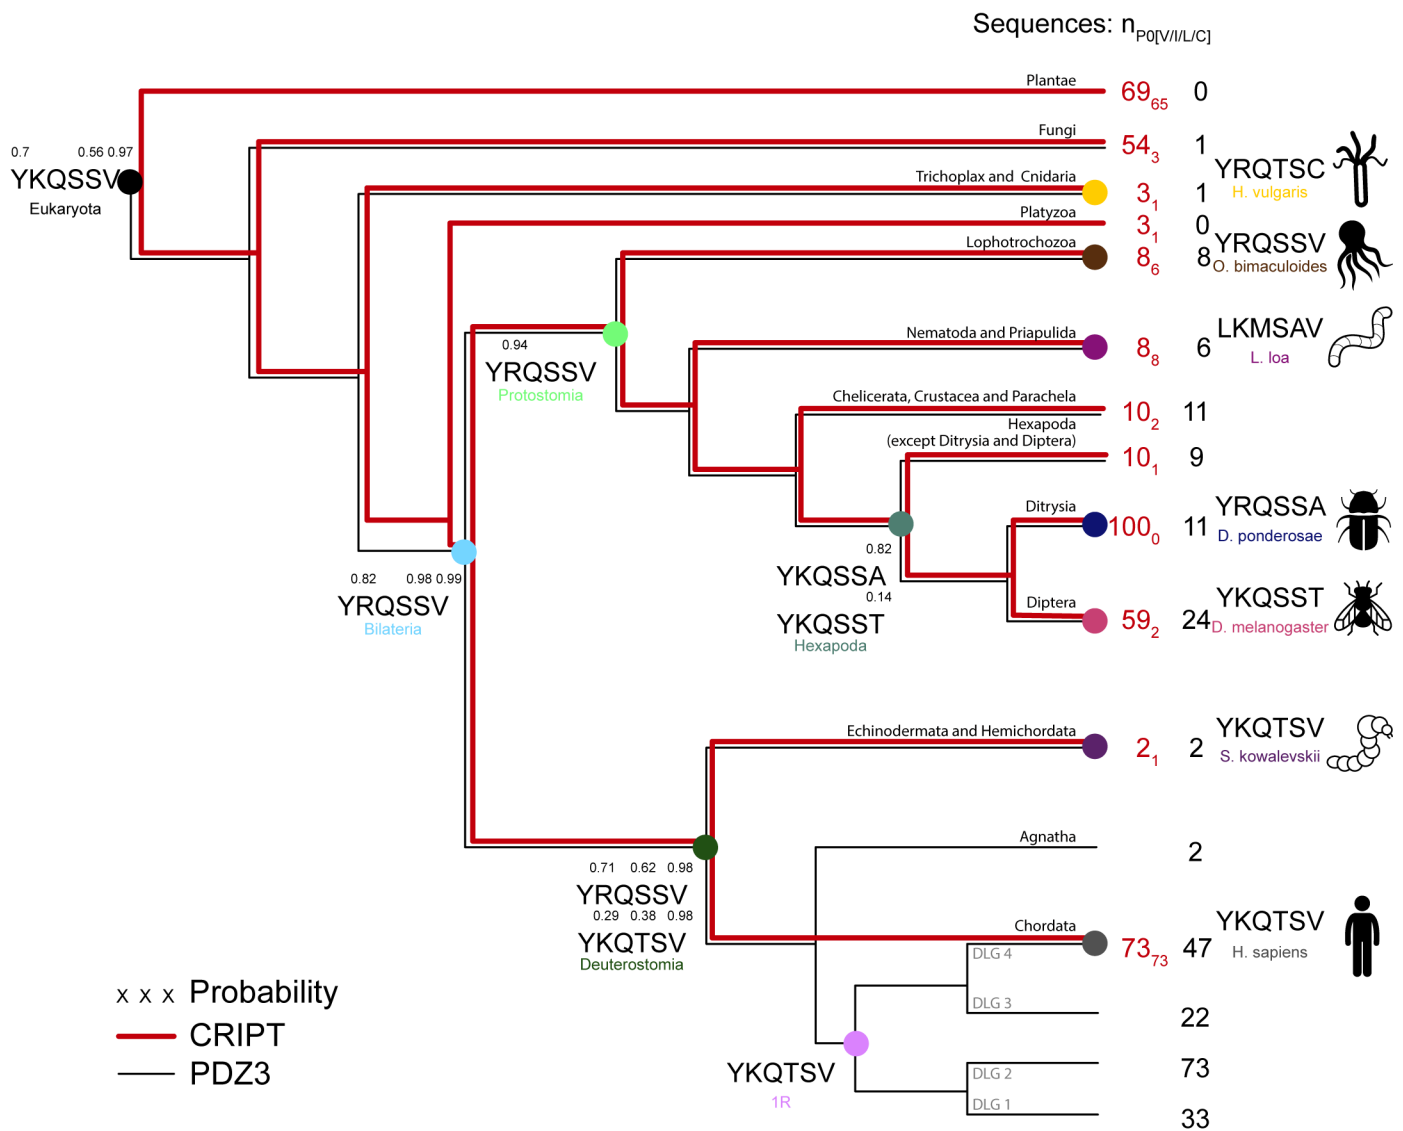

### Supplementary Fig. 3

**Evolution of the PDZ-binding motif in CRIPT.** Simplified species tree with the selected extant and reconstructed ancestral CRIPT C-terminal sequences included in the study. The color code used for the respective evolutionary node is used throughout the manuscript. The posterior probability for each reconstructed CRIPT residue is reported above the residue if different from 1. The red numbers at the branch tips correspond to the number of extant CRIPT sequences included in the ancestral reconstruction for the different animal groups. The red subscript is the number of CRIPT sequences with Val, Ile, Leu or Cys at P<sub>0</sub> (thereby possibility for a type I motif binding). The black numbers at branch tips correspond to the number of PDZ3 DLG sequences included in the ancestral reconstruction for the different animal groups.

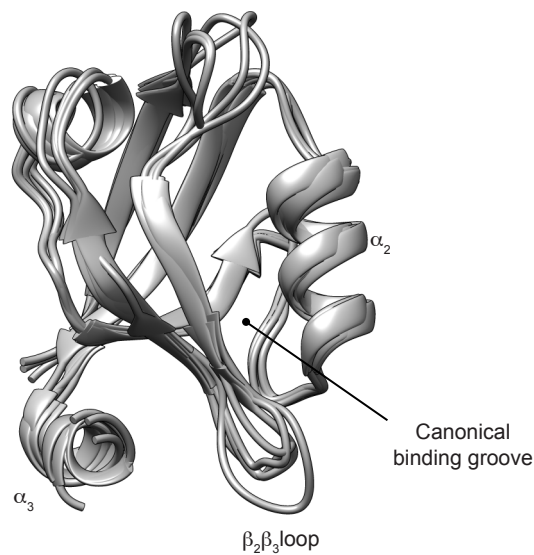

#### Supplementary Fig. 4

**Ribbon diagrams of homology models of extant and ancient variants of PDZ3:** Superimposition of homology models for all ancient and extant PDZ3 domains included in the study. The models were predicted from available structures by template search in the PDB database using the SWISS-MODEL software (Waterhouse et al. 2018). Listed are the PDB files used as template for the SWISS-MODEL modelling of the respective PDZ3 domain. *H. sapiens* (PDB:5jxb), *D. melanogaster* (PDB:1um7), *D. ponderosae* (PDB:1um7), *L. loa* (PDB:1pdr), *S. kowalevskii* (PDB:1pdr), *H. vulgaris* (PDB:5jxb), *O. bimaculoides* (PDB:1pdr), Protostomia (PDB:1um7), Bilateria (PDB:1um7), Hexapoda (PDB:1um7), Deuterostomia (PDB:5hed), 1R (PDB:1um7).

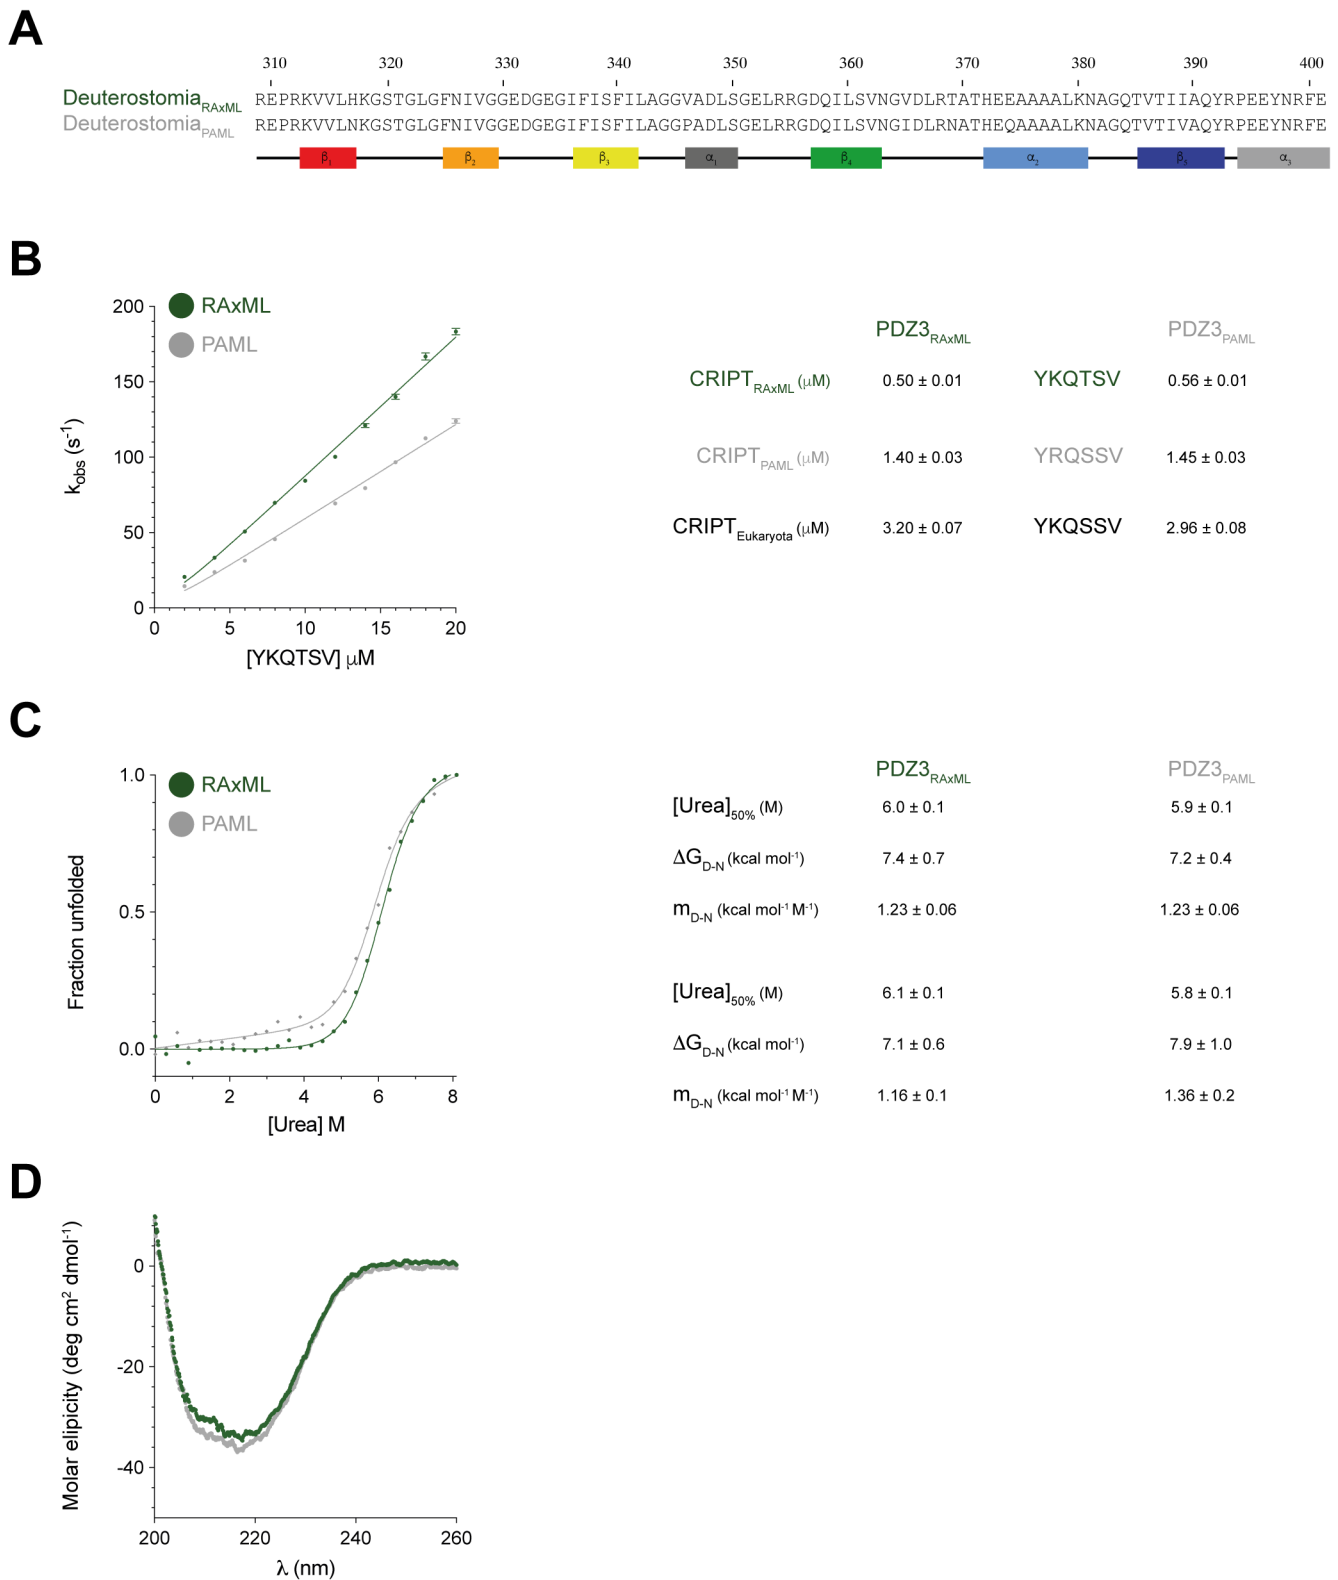

### Supplementary Fig. 5

**Comparison of ML Deuterostomia PDZ3 and CR IPT reconstructed by PAML and RAxML softwares. A** Sequences of Deuterostomia PDZ3 reconstructed by RAxML (green) and PAML (grey), respectively. **B** Affinities of ML Deuterostomia CR IPT and PDZ3 resurrected by RAxML (green) or PAML (grey). The affinity of Eukaryota CR IPT (black) to the Deuterostomia PDZ3 variants were also determined. **C** Stability of deuterostomia PDZ3 reconstructed by RAxML (green) or PAML (grey) software determined by urea denaturation (0-8.1 M), as monitored by circular dichroism at 222 nm. **D** Secondary structure content analysed by circular dichroism between 200-260 nm of Deuterostomia PDZ3 reconstructed by RAxML (green) or PAML (grey). Each spectrum is an average of 5 individual scans. All experiments performed at 10°C in 50 mM sodium phosphate, pH 7.45, 21 mM KCl (I = 150 mM).

**A**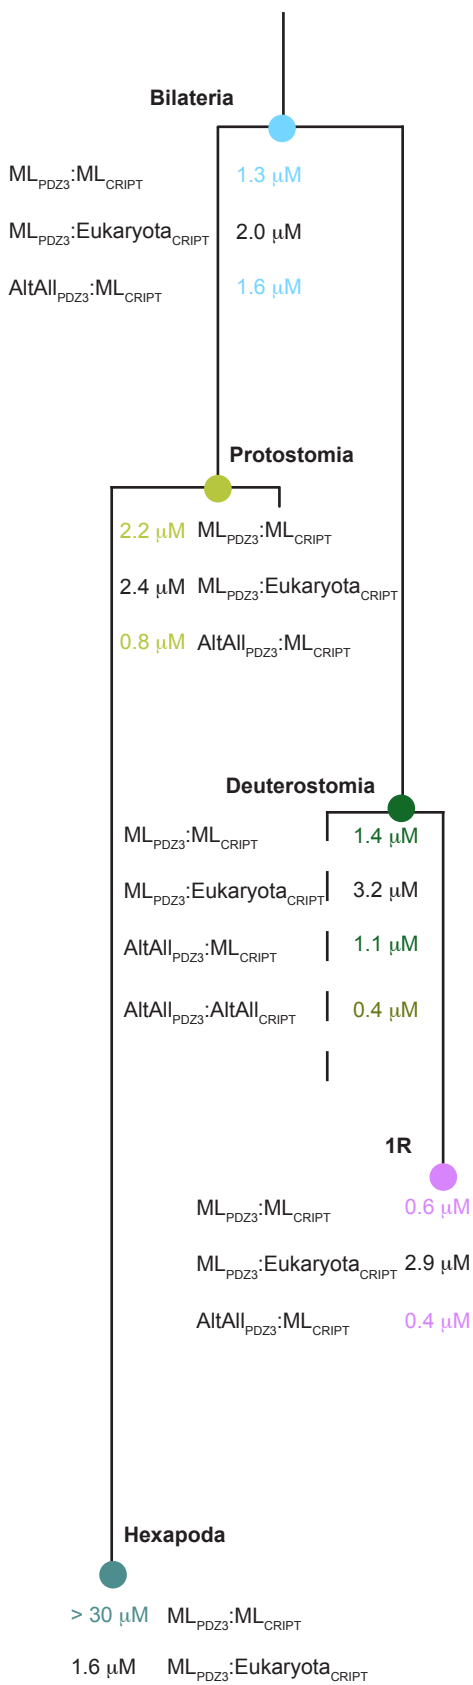**B**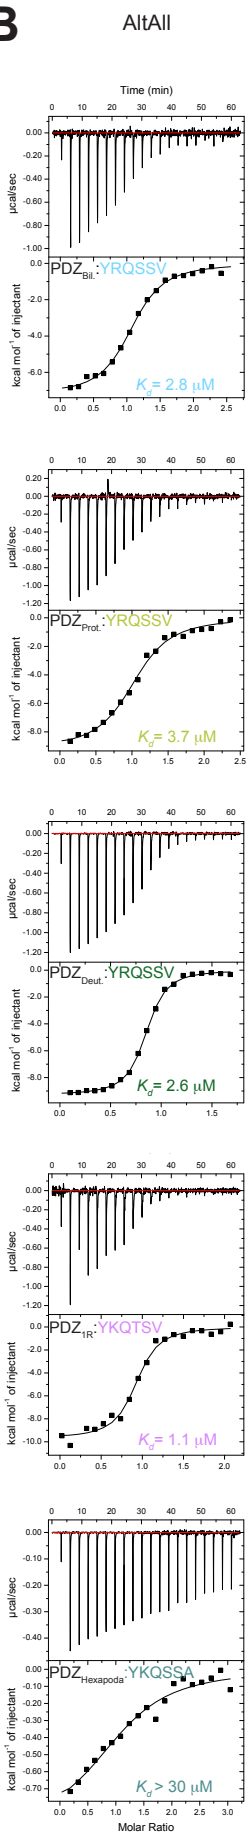**C**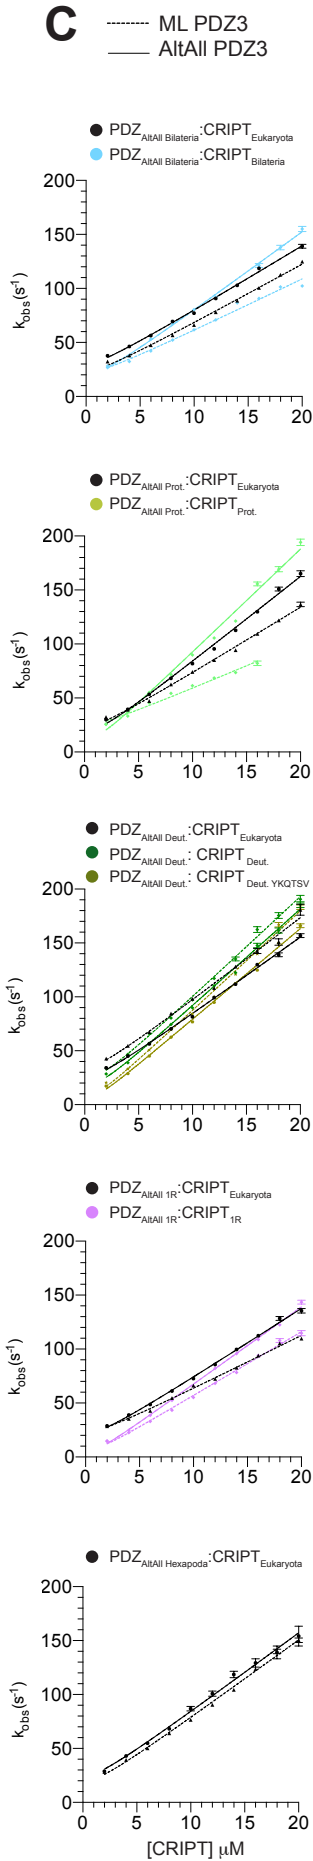**D**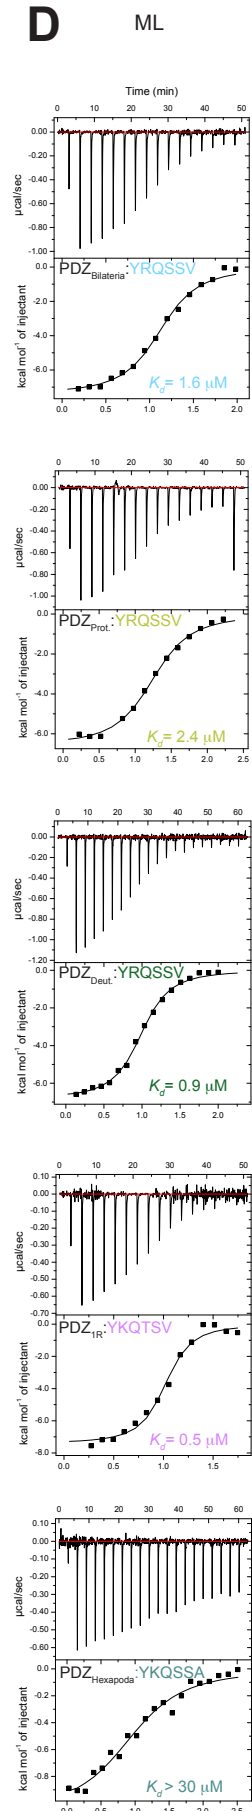

## Supplementary Fig. 6

**Comparison of PDZ3:CRIPT interaction from ML and AltAll variants suggest robustness of conclusions to uncertainty in primary structure.** Validation of the affinity of ancestral PDZ3:CRIPT interactions by comparison of reconstructed ML and AltAll variants. **A** Schematic diagram of species tree showing the evolutionary nodes of resurrected ancestral PDZ3 and CR IPT variants. The affinity determined by stopped-flow experiments are listed for the following complexes: ML PDZ3:ML CR IPT, ML PDZ3:Eukaryota CR IPT, AltAll PDZ3:ML CR IPT and AltAll PDZ3:AltAll CR IPT and colour coded according to type of CR IPT: reconstructed ancestral variant (ancestor colour code) or Eukaryota (black). Exception,  $ML_{\text{Hexapoda}}:ML_{\text{CR IPT}}$  is measured by ITC. **B** Isothermal titration calorimetry experiments for the AltAll PDZ3:CR IPT interactions at the respective nodes. **C** Binding kinetics for ancestral ML and AltAll PDZ3:CR IPT interactions. Observed rate constant were plotted as a function of CR IPT concentration at a constant concentration of PDZ3 ( $1\mu\text{M}$ ). The colour code represents the type of CR IPT: ML, AltAll, or Eukaryota CR IPT (black), whereas line style represents ML PDZ3 (dashed line) or AltAll PDZ3 (solid line). **D** Isothermal titration calorimetry experiments for the PDZ3:CR IPT interaction in the respective evolutionary nodes of ancestral variants of ML PDZ3 and native CR IPT. Experiments were performed at  $25^{\circ}\text{C}$  for ITC and at  $10^{\circ}\text{C}$  for stopped-flow in 50 mM sodium phosphate, pH 7.45, 21 mM KCl ( $I = 150\text{ mM}$ ).



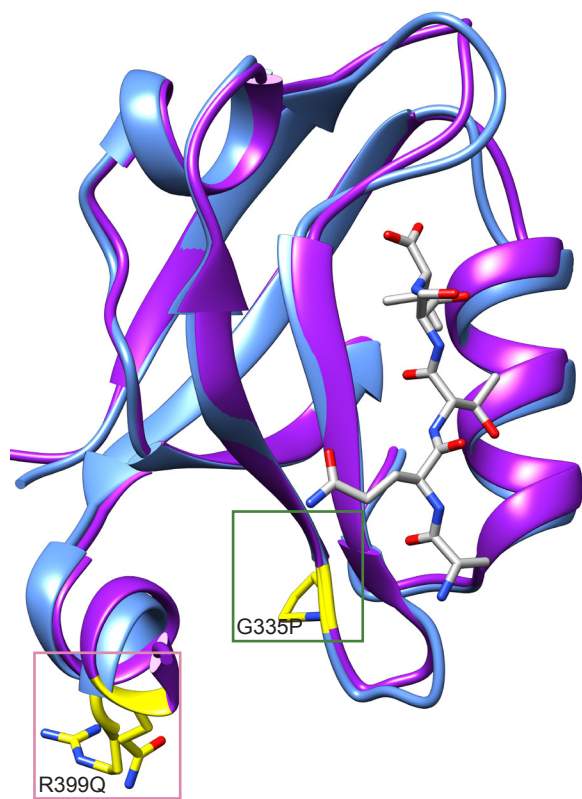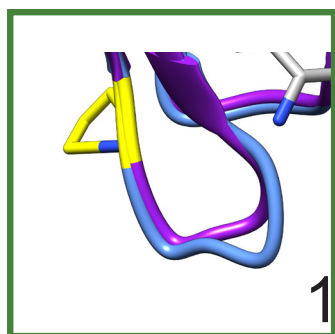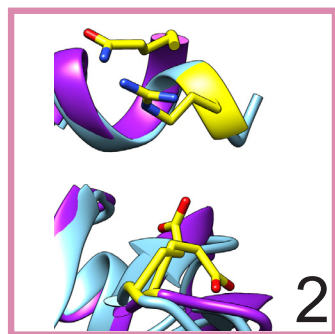

**Supplementary Fig. 7**

**Homology model of *L. loa* PDZ3.** Structural comparison of predicted SWISS model of PDZ3 from *L. loa* (purple) and the Bilaterian ancestor (light blue) gives a structural explanation of the relatively weak affinity of *L. loa* PDZ3 for the Eukaryota CRIPT peptide. 1) *L. loa* PDZ3 has a proline (yellow) instead of a glycine residue in the  $\beta_2\beta_3$  loop close to the binding pocket 2) The predicted saltbridge between R399 and E334 in the bilaterian complex (distance 6.7 Å) is not present in *L. loa* due to Q399 (yellow). *L. loa* PDZ3 P335G and Q399R were experimentally tested.

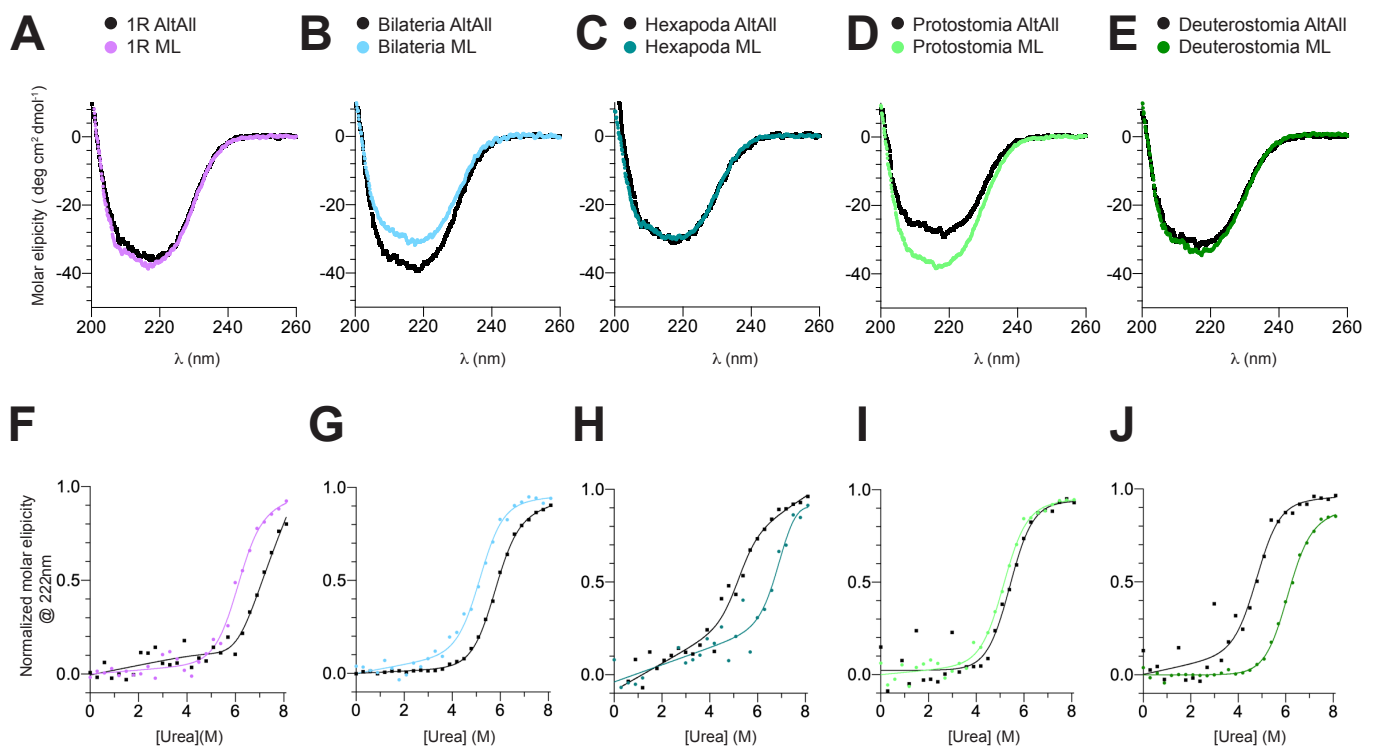

### Supplementary Fig. 8

#### Comparison of structure and global stability of resurrected ML and AltAll variants of ancestral species.

**A-E** Secondary structure content analysed by circular dichroism between 200-260 nm. Each spectrum is an average of 5 individual scans. **F-J** Urea denaturation (0-8.1 M) of ancestral ML PDZ3 variants (colour code) and the corresponding AltAll (black) PDZ3 variants, as monitored by circular dichroism at 222 nm. Data were fitted to a two-state model for protein (un)folding. See Table 3 for fitted parameters. All experiments performed at 10°C in 50 mM sodium phosphate, pH 7.45, 21 mM KCl (I = 150 mM).

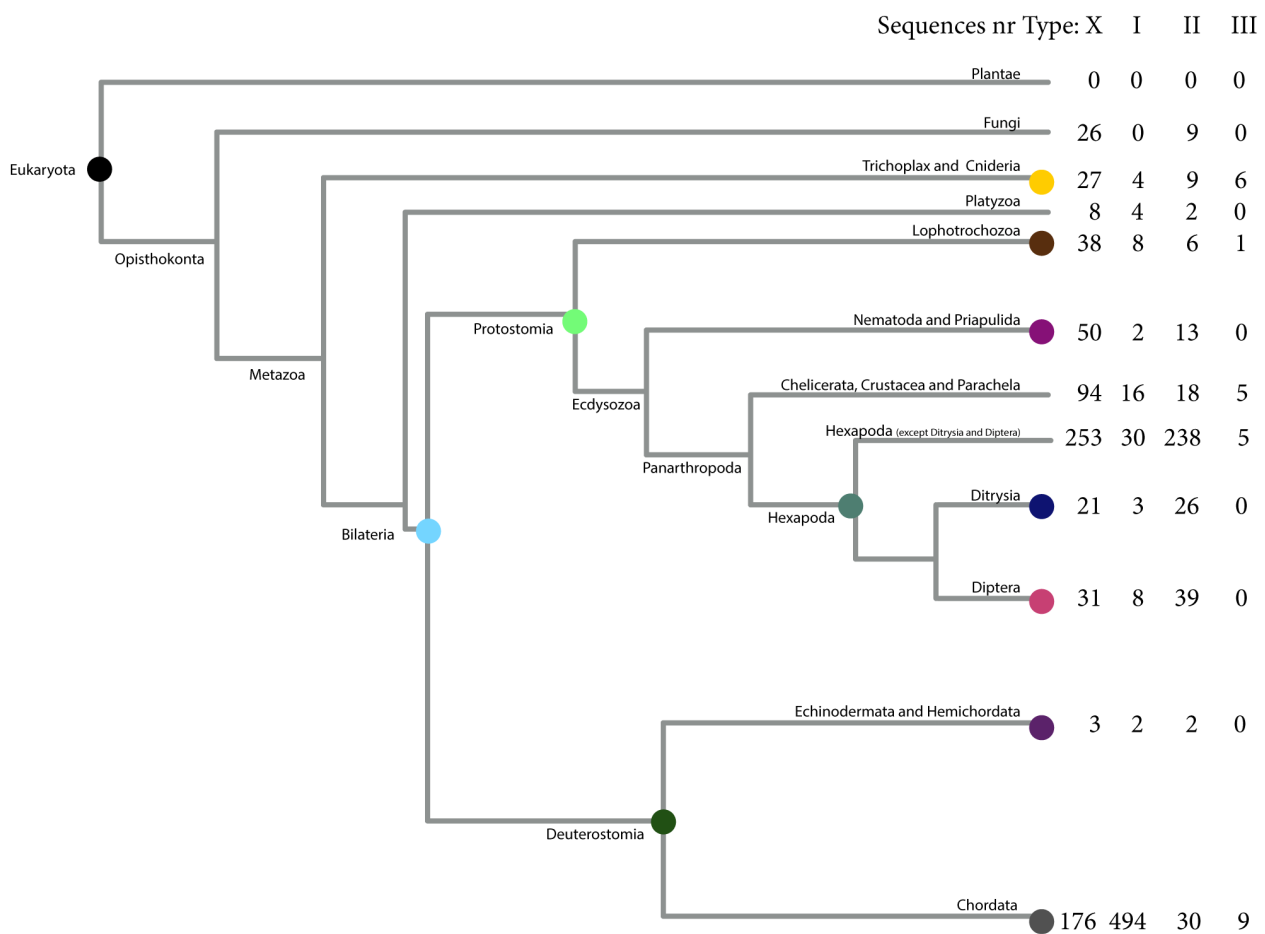

**Supplementary Fig. 9**

**Simplified species tree depicting the evolution of the PDZ-binding motif in Neuroigin.** The numbers at the branch tips correspond to the number of extant Neuroigin sequences with type X (not classified), I, II or III motif for the different animal groups.

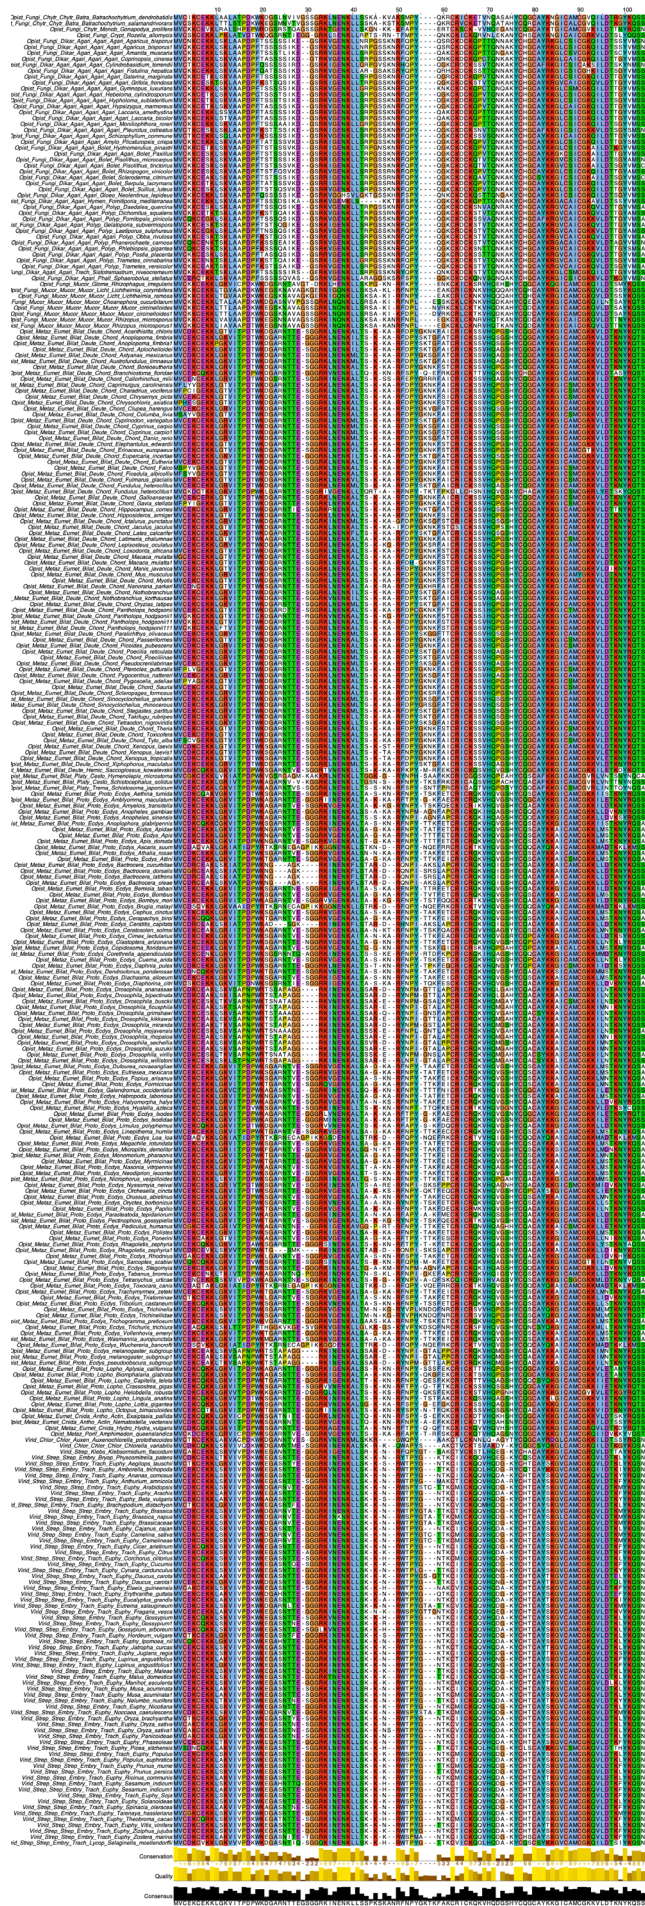

**Supplementary Fig. 10**  
**Sequence alignment of all CRIP sequences used for ancestral reconstruction.** The details on sequence conservation and quality are displayed. Conserved amino acids are colored according to their physicochemical properties. The alignment was visualised using Jalview software.

| CRIPT               | PDZ3                    | $\Delta H$ ( $\frac{\text{kcal}}{\text{mol}}$ ) | $T\Delta S$ ( $\frac{\text{kcal}}{\text{mol}}$ ) | $K_d$ ( $\mu\text{M}$ ) |
|---------------------|-------------------------|-------------------------------------------------|--------------------------------------------------|-------------------------|
| YKQTSV              | 1R                      | -9.7 ± 0.2                                      | -1.5                                             | 1.1 ± 0.2               |
|                     | <b>1R ML</b>            | <b>-7.6 ± 0.2</b>                               | <b>1.0</b>                                       | <b>0.49 ± 0.1</b>       |
|                     | Deuterostomia           | -9.3 ± 0.1                                      | -0.9                                             | 0.74 ± 0.04 *           |
|                     | <b>Deuterostomia ML</b> | <b>-8.8 ± 0.1</b>                               | <b>-0.6</b>                                      | <b>0.90 ± 0.1</b> *     |
| YRQSSV              | Deuterostomia           | -7.4 ± 0.1                                      | 0.2                                              | 2.6 ± 0.2               |
|                     | <b>Deuterostomia ML</b> | <b>-6.8 ± 0.1</b>                               | <b>0.9</b>                                       | <b>2.1 ± 0.2</b>        |
|                     | Protostomia             | -9.2 ± 0.2                                      | -1.8                                             | 3.7 ± 0.4               |
|                     | <b>Protostomia ML</b>   | <b>-6.4 ± 0.2</b>                               | <b>1.3</b>                                       | <b>2.4 ± 0.3</b>        |
|                     | Bilateria               | -7.2 ± 0.1                                      | 0.3                                              | 2.8 ± 0.3               |
| <b>Bilateria ML</b> | <b>-6.8 ± 0.2</b>       | <b>1.1</b>                                      | <b>1.6 ± 0.3</b>                                 |                         |
| YRQSSA              | Hexapoda                | -1.2 ± 0.2                                      | 5.0                                              | 31 ± 7                  |
|                     | <b>Hexapoda ML</b>      | <b>-2.3 ± 2.0</b>                               | <b>3.5</b>                                       | <b>56 ± 25</b>          |
| YRQSST              | Hexapoda                | -0.9 ± 0.2                                      | 5.2                                              | 31 ± 7                  |
|                     | <b>Hexapoda ML</b>      | <b>-1.1 ± 0.1</b>                               | <b>5.3</b>                                       | <b>21 ± 4</b>           |

**Supplementary Table 1**

**Comparison of binding constants for the PDZ3:CRIPT interaction from ML and AltAll variants measured by ITC.** To facilitate comparison binding parameters for the respective variants of ancestral AltAll (regular) and ML (bold) PDZ3 are listed for different peptide ligands: CRIPT Eukaryota (YKQSSV), CRIPT ML native (YKQTSV, YRQSSV) and AltAll CRIPT for the deuterostome ancestor (the only AltAll CRIPT variant, which is marked with \*). Thermodynamic parameters were determined by ITC at 25°C in 50 mM sodium phosphate, pH 7.45, 21 mM KCl (I = 150).

| CRIPT               | PDZ3                    | $k_{on}$ ( $\mu\text{M}^{-1} \text{s}^{-1}$ ) | $k_{off}$ ( $\text{s}^{-1}$ ) | $K_d$ ( $\mu\text{M}$ ) |
|---------------------|-------------------------|-----------------------------------------------|-------------------------------|-------------------------|
| YKQSSV              | 1R                      | 6.5 ± 0.1                                     | 14.14 ± 0.02                  | 2.19 ± 0.03             |
|                     | <b>1R ML</b>            | <b>5.3 ± 0.1</b>                              | <b>15.3 ± 0.3</b>             | <b>2.89 ± 0.09</b>      |
|                     | Deuterostomia           | 7.2 ± 0.1                                     | 15.7 ± 0.1                    | 2.17 ± 0.03             |
|                     | <b>Deuterostomia ML</b> | <b>7.4 ± 0.2</b>                              | <b>23.61 ± 0.03</b>           | <b>3.17 ± 0.07</b>      |
|                     | Hexapoda                | 7.4 ± 0.2                                     | 11.6 ± 0.1                    | 1.57 ± 0.04             |
|                     | <b>Hexapoda ML</b>      | <b>7.3 ± 0.1</b>                              | <b>11.5 ± 0.1</b>             | <b>1.58 ± 0.03</b>      |
|                     | Protostomia             | 7.9 ± 0.2                                     | 12.0 ± 0.1                    | 1.52 ± 0.03             |
|                     | <b>Protostomia ML</b>   | <b>6.5 ± 0.1</b>                              | <b>15.5 ± 1.3</b>             | <b>2.38 ± 0.19</b>      |
|                     | Bilateria               | 6.2 ± 0.1                                     | 20.7 ± 0.1                    | 3.31 ± 0.08             |
| <b>Bilateria ML</b> | <b>5.9 ± 0.1</b>        | <b>11.9 ± 0.3</b>                             | <b>2.04 ± 0.06</b>            |                         |
| YKQTSV              | 1R                      | 7.2 ± 0.1                                     | 2.92 ± 0.02                   | 0.41 ± 0.01             |
|                     | <b>1R ML</b>            | <b>6.2 ± 0.1</b>                              | <b>3.46 ± 0.02</b>            | <b>0.56 ± 0.01</b>      |
|                     | Deuterostomia           | 8.4 ± 0.1                                     | 3.33 ± 0.01                   | 0.39 ± 0.01 *           |
|                     | <b>Deuterostomia ML</b> | <b>9.3 ± 0.2</b>                              | <b>5.02 ± 0.03</b>            | <b>0.54 ± 0.01</b> *    |
| YRQSSV              | Deuterostomia           | 9.0 ± 0.1                                     | 9.6 ± 0.1                     | 1.06 ± 0.02             |
|                     | <b>Deuterostomia ML</b> | <b>9.4 ± 0.2</b>                              | <b>13.4 ± 0.1</b>             | <b>1.43 ± 0.03</b>      |
|                     | Protostomia             | 9.6 ± 0.3                                     | 7.61 ± 0.05                   | 0.79 ± 0.02             |
|                     | <b>Protostomia ML</b>   | <b>4.6 ± 0.3</b>                              | <b>10.3 ± 0.1</b>             | <b>2.24 ± 0.14</b>      |
|                     | Bilateria               | 7.4 ± 0.2                                     | 12.0 ± 0.3                    | 1.62 ± 0.05             |
| <b>Bilateria ML</b> | <b>5.1 ± 0.2</b>        | <b>6.8 ± 0.1</b>                              | <b>1.33 ± 0.06</b>            |                         |

### Supplementary Table 2

**Comparison of binding constants for the PDZ3:CRIPT interaction for ML and AltAll variants.** To facilitate comparison, binding parameters for the respective variants of ancestral AltAll (regular) and ML (bold) PDZ3 are listed for different peptide ligands: CR IPT Eukaryota (YKQSSV), CR IPT ML native (YKQTSV, YRQSSV) and AltAll CR IPT for the deuterostome ancestor (the only AltAll CR IPT variant, which is marked with \*). The association rate constant ( $k_{on}$ ) was obtained from binding experiment, and the dissociation rate constant ( $k_{off}$ ) from displacement experiment, by stopped-flow experiments. The dissociation constant  $K_d$  was calculated as  $k_{off}/k_{on}$ . All experiments performed at 10°C in 50 mM sodium phosphate, pH 7.45, 21 mM KCl (I = 150 mM).

## References:

Huson, D. H., and C. Scornavacca. 2012. 'Dendroscope 3: an interactive tool for rooted phylogenetic trees and networks', *Syst Biol*, 61: 1061-7.

Waterhouse, A., M. Bertoni, S. Bienert, G. Studer, G. Tauriello, R. Gumienny, F. T. Heer, T. A. P. de Beer, C. Rempfer, L. Bordoli, R. Lepore, and T. Schwede. 2018. 'SWISS-MODEL: homology modeling of protein structures and complexes', *Nucleic Acids Res*, 46: W296-W303.
